# Supplementary material for: Use of the self-organising map network (SOMNet) as a decision support system for regional mental health planning
Source: PubMed Central journal article supplement (PMC5922302; doi:10.1186/s12961-018-0308-y), 2018-04-25
Supplement: 12961_2018_308_MOESM2_ESM.pdf [file 12961_2018_308_MOESM2_ESM.pdf]

| Data | Area Name (Biscay) | Data | Area Name (Gipuzkoa) |
|------|--------------------|------|----------------------|
| B1   | Ajuriaguerra       | G20  | Alto Deba-Arrasate   |
| B2   | Barakaldo          | G21  | Amara                |
| B3   | Basauri            | G22  | Andoain              |
| B4   | Bermeo             | G23  | Azpeitia             |
| B5   | Derio              | G24  | Beasain              |
| B6   | Durango            | G25  | Eguia                |
| B7   | Erandio            | G26  | Eibar                |
| B8   | Ercilla            | G27  | Irun                 |
| B9   | Etxaniz            | G28  | Ondarreta            |
| B10  | Galdakao           | G29  | Renteria             |
| B11  | Gernika            | G30  | Tolosa               |
| B12  | Ortuella           | G31  | Zarautz              |
| B13  | Otxarkoaga         | G32  | Zumarraga            |
| B14  | Portugalete        |      |                      |
| B15  | Santurtzi          |      |                      |
| B16  | Sestao             |      |                      |
| B17  | Uribe              |      |                      |
| B18  | Zalla              |      |                      |
| B19  | <b>Rekalde</b>     |      |                      |

(a) The Basque Country

| Data | Area Name                         | Data | Area Name                              | Data | Area Name                    | Data | Area Name                |
|------|-----------------------------------|------|----------------------------------------|------|------------------------------|------|--------------------------|
| C1   | CSMA Alt Empordà                  | C21  | CSMA Esplugues de Llobregat            | C41  | CSMA Mollet                  | C61  | CSMA Segarra de Cervera  |
| C2   | CSMA Alt Penedès                  | C22  | CSMA Garraf                            | C42  | CSMA Mora d'Ebre             | C62  | CSMA Selva Marítima      |
| C3   | CSMA Amposta                      | C23  | CSMA Gavà                              | C43  | CSMA Nou Barris Nord         | C63  | <b>CSMA Seu d'Urgell</b> |
| C4   | CSMA Anoia                        | C24  | CSMA Gironès - Pla De L'Estany         | C44  | CSMA Nou Barris Sud          | C64  | <b>CSMA Sort</b>         |
| C5   | CSMA Badalona 1                   | C25  | <b>CSMA Gràcia</b>                     | C45  | CSMA Olot-Garrotxa           | C65  | CSMA Tarragona Nord      |
| C6   | CSMA Badalona 2                   | C26  | CSMA Guinardó                          | C46  | CSMA Osona                   | C66  | CSMA Tarragona Sud       |
| C7   | CSMA Badia                        | C27  | CSMA Horta                             | C47  | CSMA Poble Sec/Montjuïc      | C67  | CSMA Tàrrrega            |
| C8   | CSMA Bages-Manresa                | C28  | CSMA Hospitalet 1                      | C48  | CSMA Reus                    | C68  | CSMA Terrassa 1          |
| C9   | CSMA Baix Empordà                 | C29  | CSMA Hospitalet 2 (ICS)                | C49  | CSMA Ripollès                | C69  | CSMA Terrassa 2          |
| C10  | CSMA Balaguer                     | C30  | CSMA La Mina                           | C50  | CSMA Rubí                    | C70  | CSMA Tortosa             |
| C11  | CSMA Berga                        | C31  | CSMA La Selva Interior                 | C51  | CSMA Sabadell 1              | C71  | CSMA Tremp               |
| C12  | CSMA Borges Blanques              | C32  | CSMA Les Corts                         | C52  | CSMA Sabadell 2              | C72  | CSMA Vallès Oriental     |
| C13  | CSMA Castelldefels                | C33  | CSMA Lleida                            | C53  | CSMA Sant Andreu             | C73  | CSMA Valls               |
| C14  | CSMA Cerdanyola-Ripollet-Montcada | C34  | CSMA Maragall                          | C54  | CSMA Sant Boi                | C74  | <b>CSMA Vielha</b>       |
| C15  | CSMA Ciutat Vella                 | C35  | <b>CSMA Maresme Centre/<br/>Mataró</b> | C55  | CSMA Sant Cugat              |      |                          |
| C16  | CSMA Cornellà                     | C36  | CSMA Maresme Nord                      | C56  | CSMA Sant Feliu de Llobregat |      |                          |
| C17  | <b>CSMA Eixample Dreta</b>        | C37  | CSMA Maresme Sud                       | C57  | CSMA Sant Martí Nord         |      |                          |
| C18  | CSMA Eixample Esquerra            | C38  | CSMA Martí i Julià                     | C58  | CSMA Sant Martí Sud          |      |                          |
| C19  | CSMA El Prat de Llobregat         | C39  | CSMA Martorell                         | C59  | CSMA Sants                   |      |                          |
| C20  | CSMA El Vendrell                  | C40  | CSMA Mollerussa                        | C67  | CSMA Sarrià-Sant Gervasi     |      |                          |

(b) Catalonia
