# Supplementary material for: Use of the self-organising map network (SOMNet) as a decision support system for regional mental health planning
Source: PubMed Central journal article supplement (PMC5922302; doi:10.1186/s12961-018-0308-y), 2018-04-25

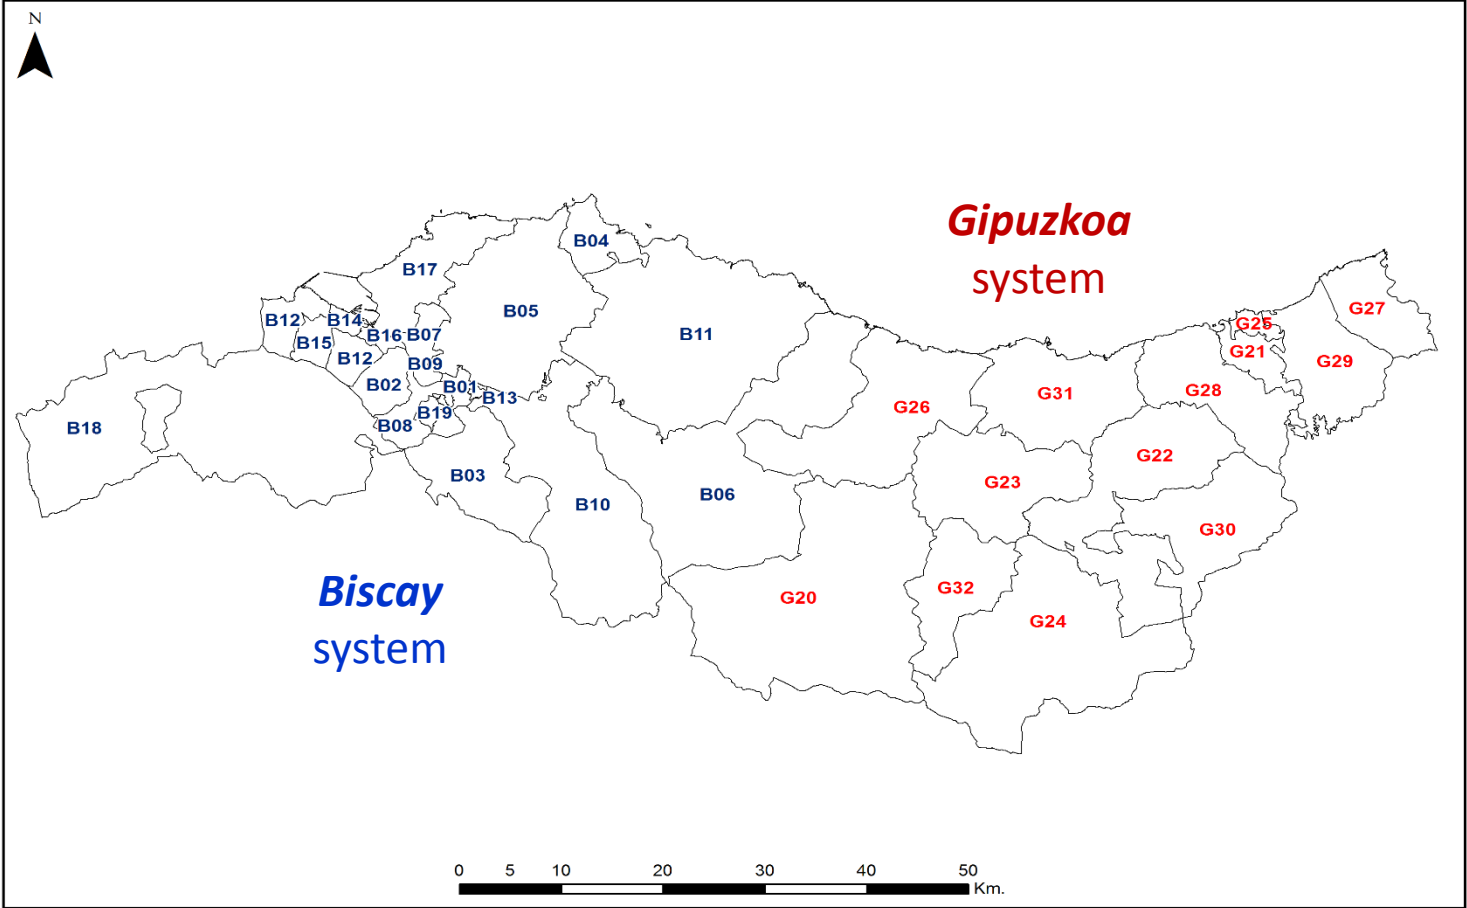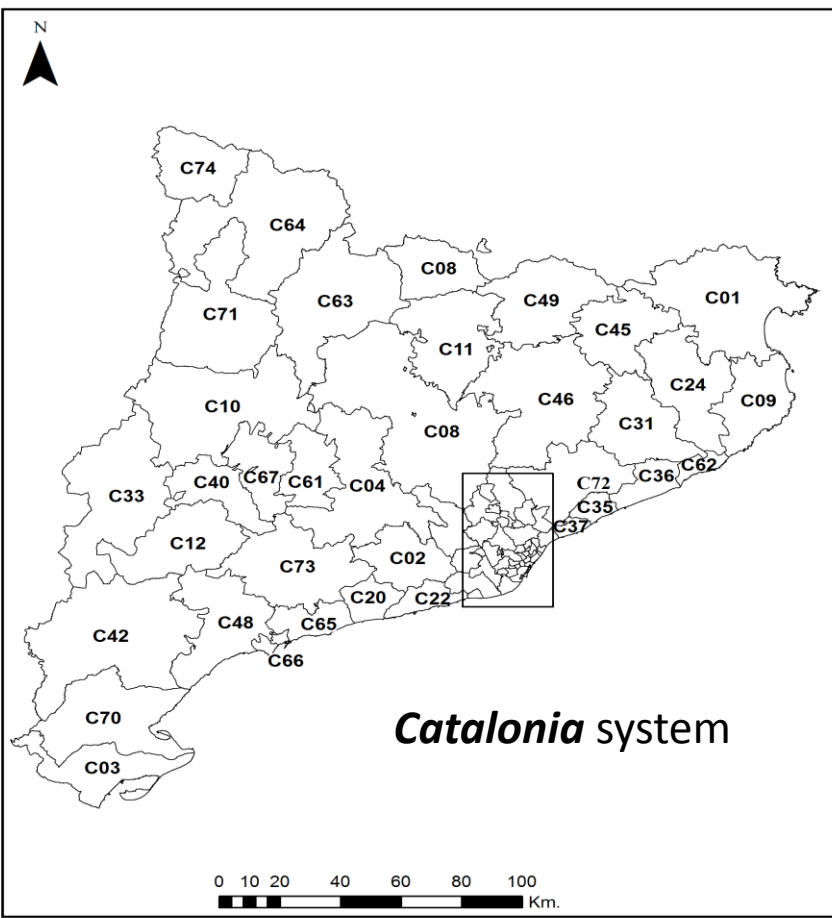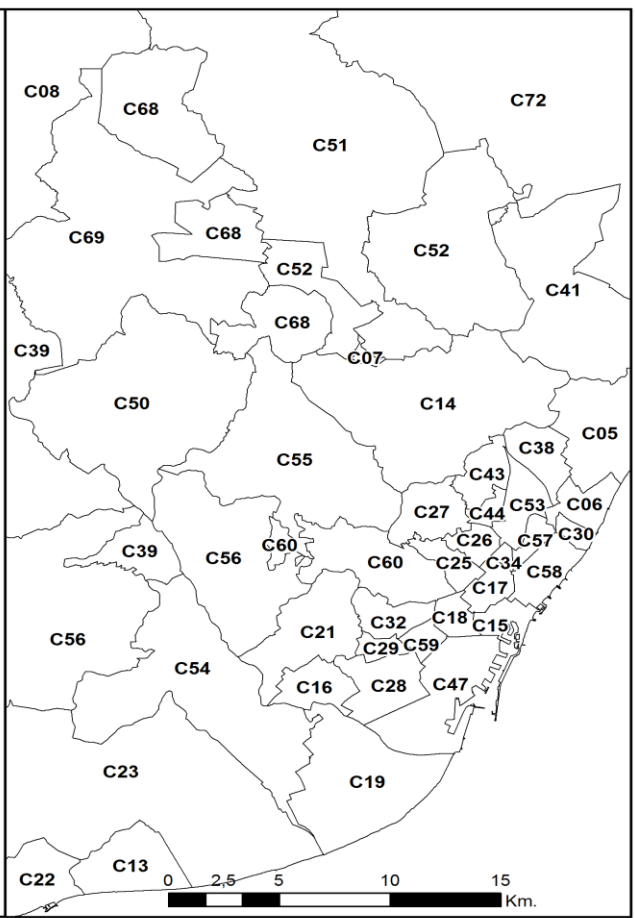

Supplement: 12961_2018_308_MOESM3_ESM.pdf [file 12961_2018_308_MOESM3_ESM.pdf]
