# Supplementary material for: Use of the self-organising map network (SOMNet) as a decision support system for regional mental health planning
Source: PubMed Central journal article supplement (PMC5922302; doi:10.1186/s12961-018-0308-y), 2018-04-25

# USE OF DESDE-LTC FOR MAPPING, COMPARATIVE ANALYSIS OF SERVICE PROVISION, AND MODELLING

## A) Multi-step mental health service coding and mapping process using DESDE-LTC.

Step 1 - Local identification of all the services available in the system and identification of the care teams or BSICs in every service; Step 2 - coding all the BSICs identified using an international taxonomy based on activity and not on the names of the services (main types of care - MTC); Step 3 - Additional coding of the target population and qualifiers; Step 4 - geolocation of services in relation to local morbidity and aggregation of data to the regional level to prepare the Atlas of Mental Health Care

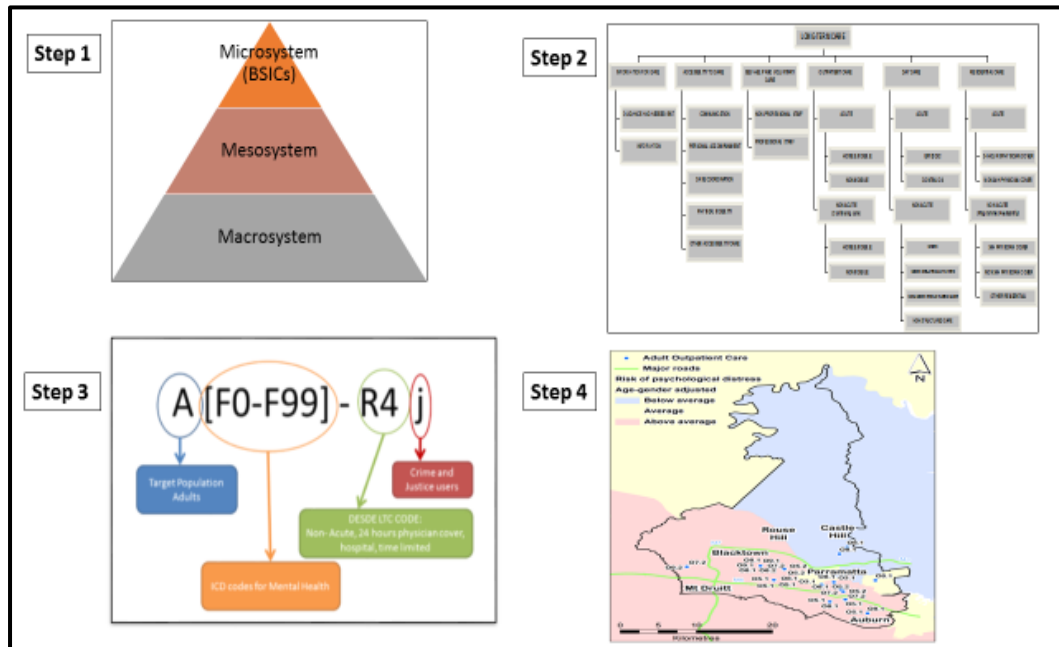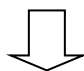

## B) Development of the Atlas of Mental Health Care

Step 5 - Geo-spatial representation of the socio-demographics, population, prevalence, and utilisation data; Step 6 - Analysis of the Balance of Care (e.g. hospital vs. outpatient care, health vs. social care); Step 7 - Availability of services by their statutory name and by MTC (DESDE-LTC), places and beds (placement capacity) and professionals (workforce capacity); Step 8 - patterns of care provision and comparison with other jurisdictions (regional, state, national and international)

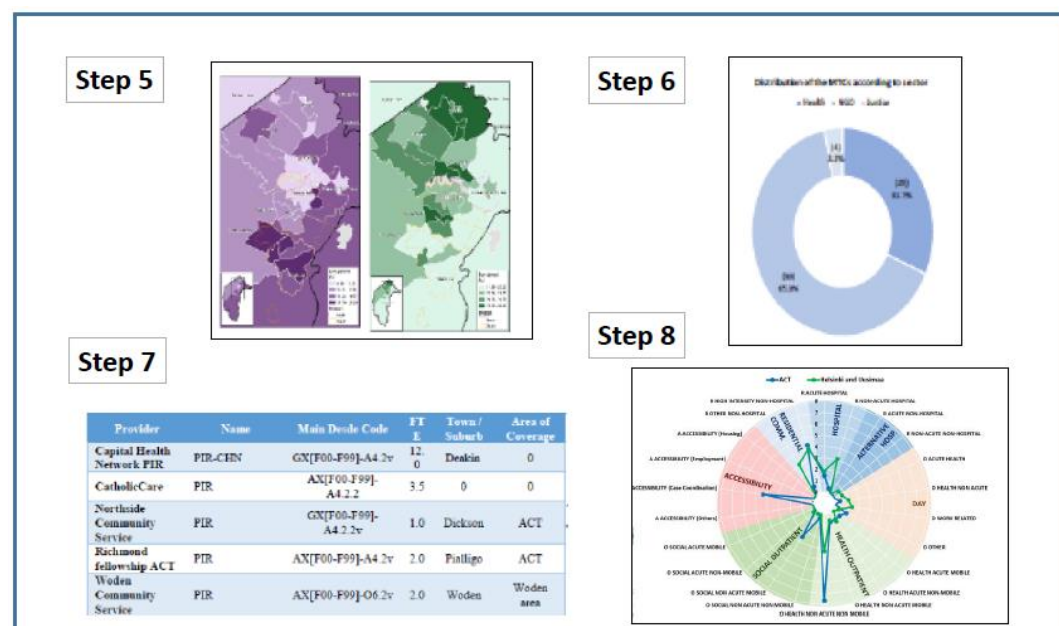

Supplement: 12961_2018_308_MOESM4_ESM.pdf [file 12961_2018_308_MOESM4_ESM.pdf]
